# Supplementary material for: A comparison of portable XRF and ICP-OES analysis for lead on air filter samples from a lead ore concentrator mill and a lead-acid battery recycler
Source: Royal Society of Chemistry journal article supplement (doi:10.1039/b518075a), 2006-01-01
Supplement: b518075a.pdf [file b518075a.pdf]

List of figures:

1. Mine concentrate mill: plot of XRF vs. ICP results for GSP sampler calculated using the average of all three readings (dashed line) and also using the center reading only (solid line). Note two high values were removed from the regression.
2. Mine concentrate mill: plot of XRF vs. ICP results for CFC sampler calculated using NIOSH (solid line) and OSHA (dashed line) algorithm
3. Mine concentrate mill: plot of XRF vs. ICP results for IOM sampler using both 3.46 cm<sup>2</sup> (solid line) and 2.84 cm<sup>2</sup> (dashed line) filter areas for calculation.
4. Mine concentrate mill: plot of XRF vs. ICP results for Button sampler.
5. Mine concentrate mill: plot of XRF vs. ICP results for 25 mm open-faced sampler. Note one high value was removed from the regression.
6. Lead-acid battery recycler: plot of XRF vs. ICP results for GSP using the average of all three readings and also using the center reading only. Note two high values were removed from the regression. Regression lines are almost completely superimposed).
7. Lead-acid battery recycler: plot of XRF vs. ICP results for CFC samples analyzed without support pads calculated using NIOSH (solid line) and OSHA (dashed line) algorithms.
8. Lead-acid battery recycler: plot of XRF vs. ICP results for CFC sampler analyzed with support pads calculated using NIOSH (solid line) and OSHA (dashed line) algorithms.
9. Lead-acid battery recycler: plot of XRF vs. ICP results for IOM sampler using both 3.46 cm<sup>2</sup> (solid line) and 2.84 cm<sup>2</sup> (dashed line) filter areas for calculation.
10. Lead-acid battery recycler: plot of XRF vs. ICP results for Button sampler .
11. Lead-acid battery recycler: plot of XRF vs. ICP results for 25 mm open-faced sampler. Note one high value was removed from the regression.

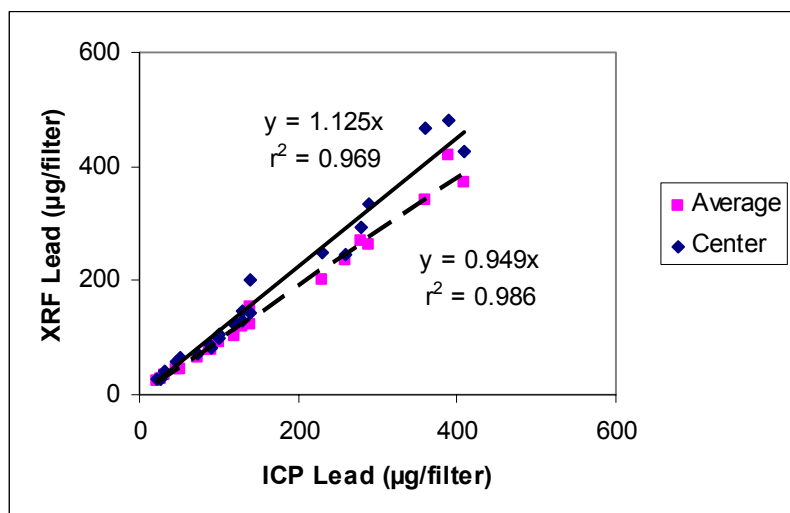

Figure 1

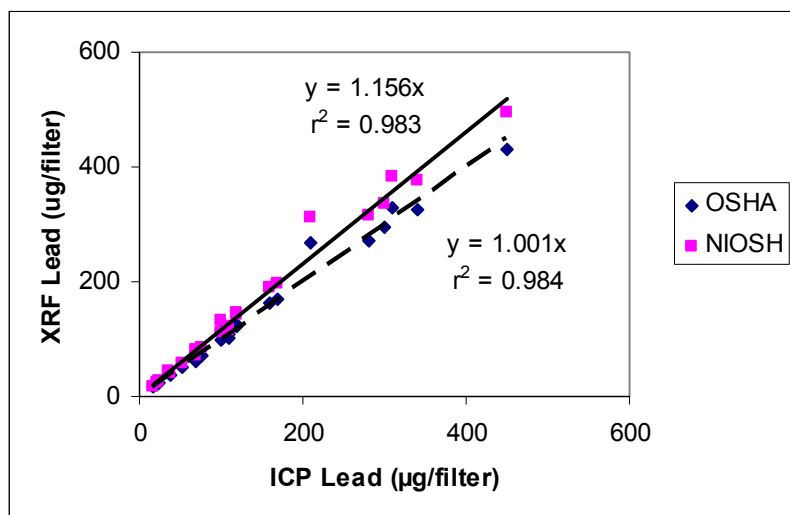

Figure 2

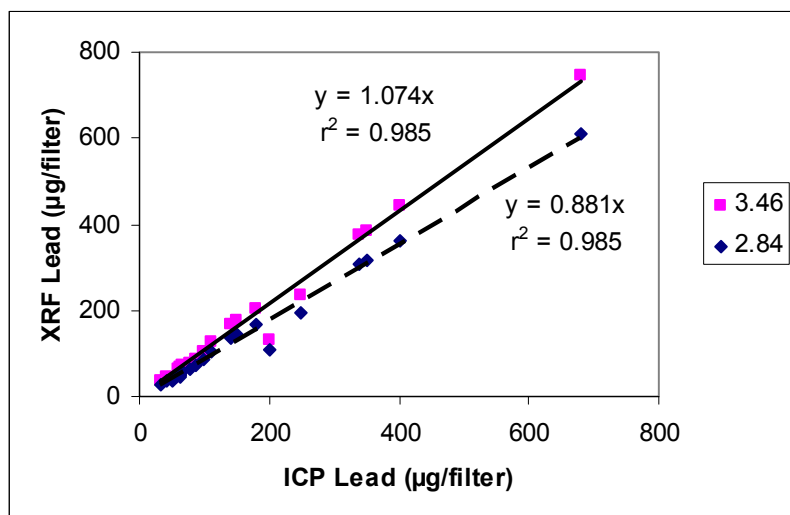

Figure 3

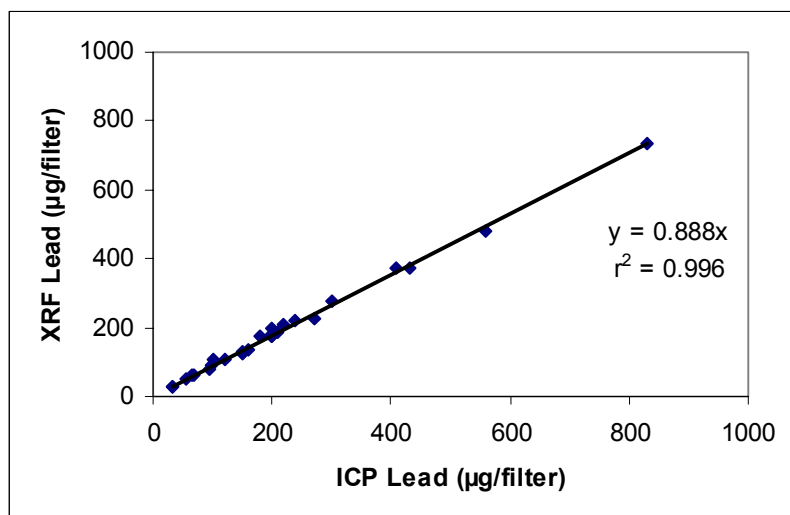

Figure 4

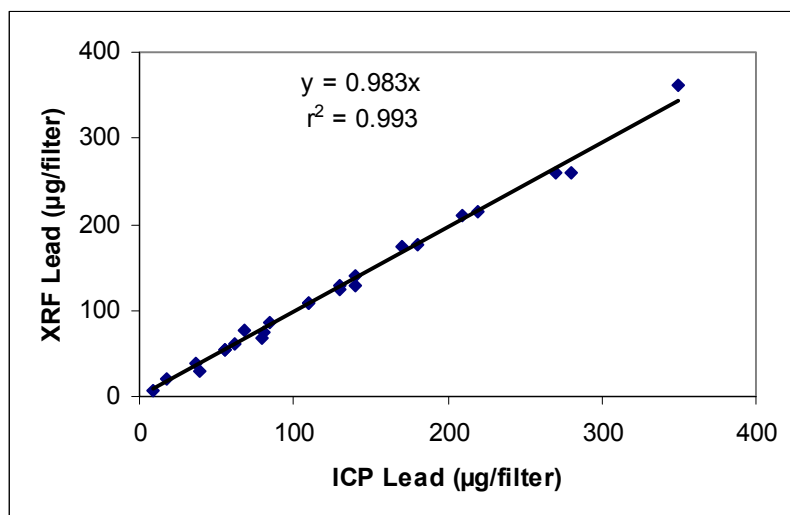

Figure 5

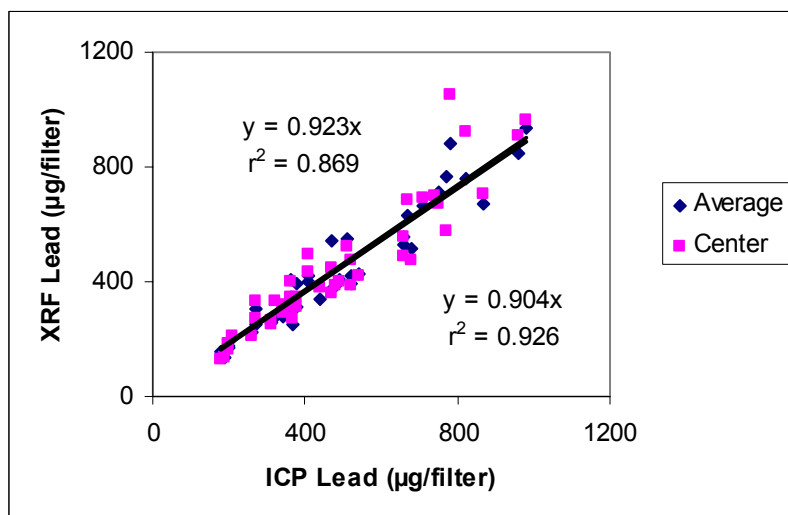

Figure 6

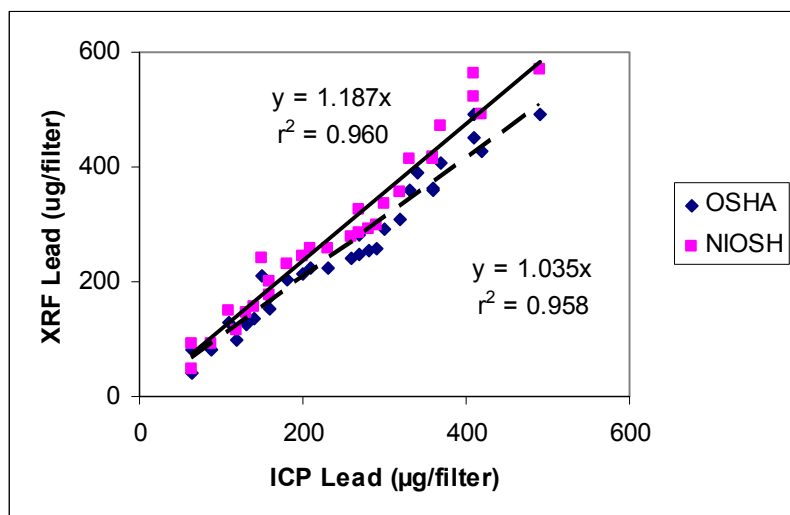

Figure 7



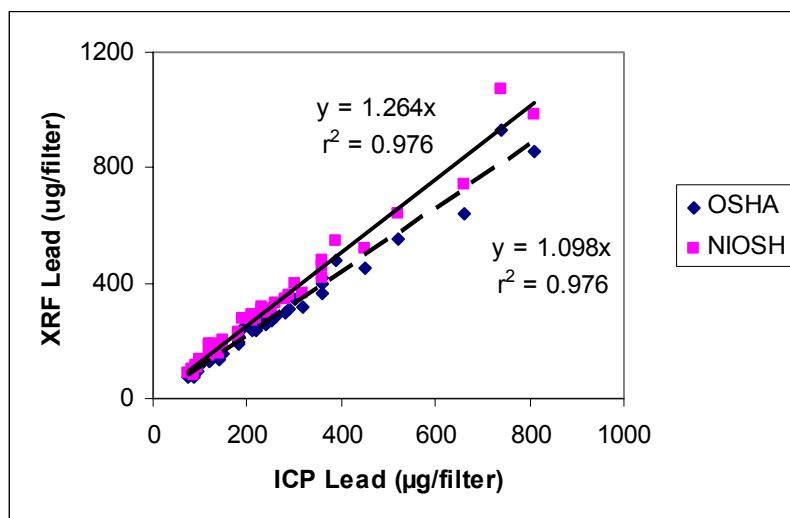

Figure 8

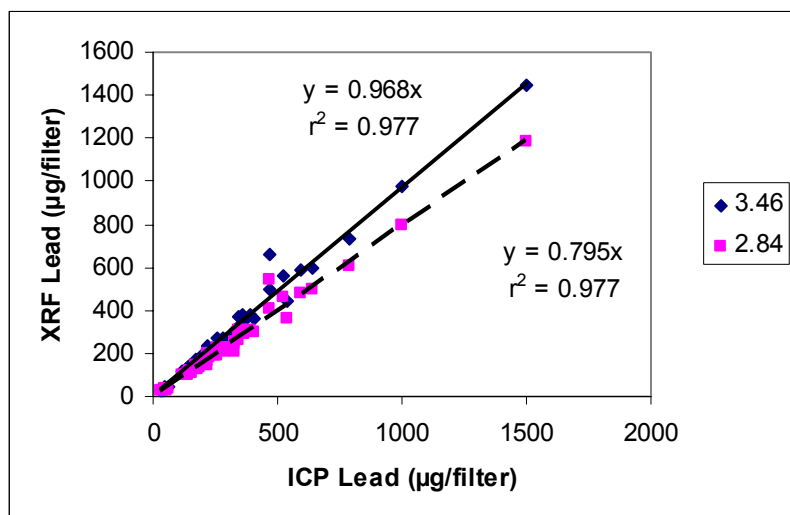

Figure 9

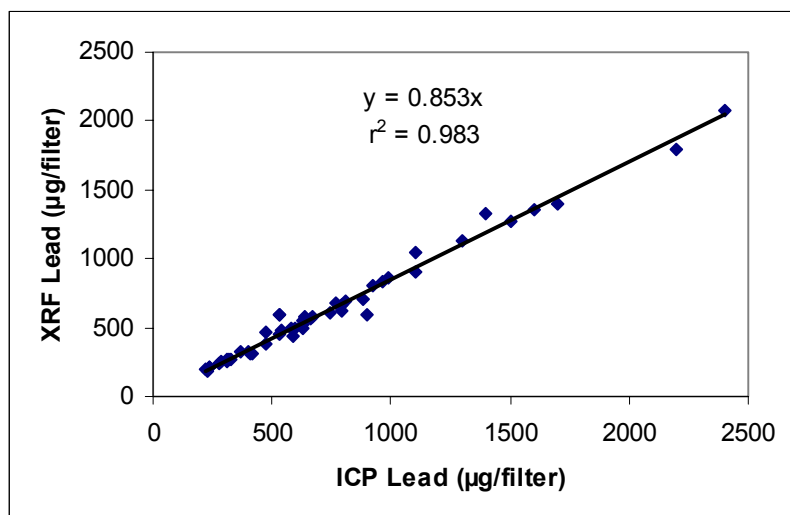

Figure 10

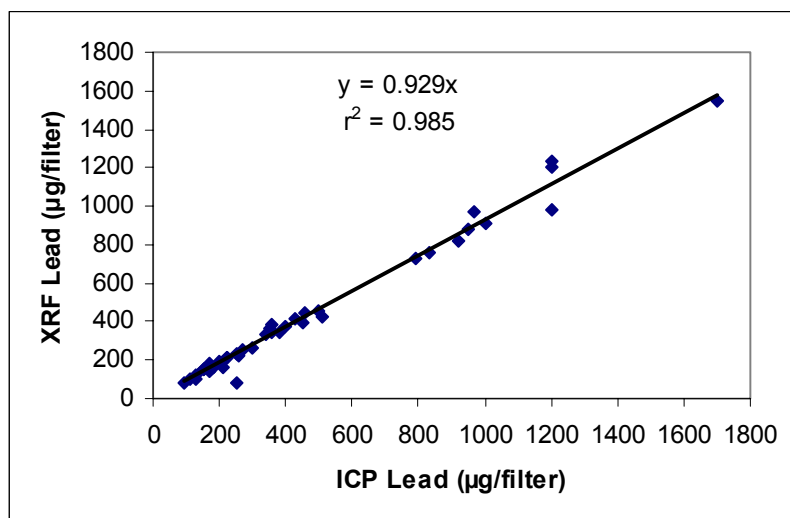

Figure 11
